# Supplementary material for: Modelling the Mass Transfer Process of Malvidin-3-Glucoside during Simulated Extraction from Fresh Grape Solids under Wine-Like Conditions
Source: Molecules. 2018 Aug 27;23(9):2159. doi: 10.3390/molecules23092159 (PMC6225164; doi:10.3390/molecules23092159)
Supplement: Supplementary file 1 [file molecules-23-02159-s001.xlsx]

## Sheet: Sheet2
						n (ie # of replicates)	2
Trial Conditions			Diffusion/Mass transfer property
A	B	C	run 1	run 2	sum
T	Glucose	Ethanol				A	B	C	AB	AC	BC	ABC
Low	Low	Low	5.974e-14	6.1109e-14	1.20849e-13	-1	-1	-1	1	1	1	-1
Low	High	Low	5.7747e-14	5.5582e-14	1.13329e-13	-1	1	-1	-1	1	-1	1
Low	Low	High	1.2618e-13	1.3115e-13	2.5733e-13	-1	-1	1	1	-1	-1	1
Low	High	High	8.9539e-14	7.5894e-14	1.65433e-13	-1	1	1	-1	-1	1	-1
High	Low	Low	4.24e-13	3.033e-13	7.273e-13	1	-1	-1	-1	-1	1	1
High	High	Low	2.8055e-13	2.6215e-13	5.427e-13	1	1	-1	1	-1	-1	-1
High	Low	High	5.8567e-13	9.4297e-13	1.52864e-12	1	-1	1	-1	1	-1	-1
High	High	High	6.6236e-13	6.2414e-13	1.2865e-12	1	1	1	1	1	1	1
					main effect	4.28525e-13	-6.57696e-14	2.16716e-13	-4.09154e-14	1.69569e-13	-1.77396e-14	3.35462e-15
					sum of squares	7.34534e-25	1.73026e-26	1.87863e-25	6.69627e-27	1.15015e-25	1.25878e-27	4.5014e-29
						sum of squares	degrees of freedom	mean square	F0	p
				T	A	7.34534e-25	1	7.34534e-25	81.4743	1.81376e-05
				Glucose	B	1.73026e-26	1	1.73026e-26	1.9192	0.203345
				Ethanol	C	1.87863e-25	1	1.87863e-25	20.8377	0.00183822
					AB	6.69627e-27	1	6.69627e-27	0.742748	0.413867
					AC	1.15015e-25	1	1.15015e-25	12.7574	0.00727506
					BC	1.25878e-27	1	1.25878e-27	0.139623	0.718364
					ABC	4.5014e-29	1	4.5014e-29	0.00499294	0.945402
					Error	7.21243e-26	8	9.01553e-27
					Total	1.13484e-24	15
						n (ie # of replicates)	2
Trial Conditions			Diffusion/Mass transfer property
A	B	C	run 1	run 2	sum
T	Glucose	Ethanol				A	B	C	AB	AC	BC	ABC
Low	Low	Low	7.0062e-11	7.1667e-11	1.41729e-10	-1	-1	-1	1	1	1	-1
Low	High	Low	6.7725e-11	6.5186e-11	1.32911e-10	-1	1	-1	-1	1	-1	1
Low	Low	High	1.4799e-10	1.5381e-10	3.018e-10	-1	-1	1	1	-1	-1	1
Low	High	High	1.0501e-10	8.9008e-11	1.94018e-10	-1	1	1	-1	-1	1	-1
High	Low	Low	4.9727e-10	3.5571e-10	8.5298e-10	1	-1	-1	-1	-1	1	1
High	High	Low	3.2903e-10	3.0745e-10	6.3648e-10	1	1	-1	1	-1	-1	-1
High	Low	High	6.8687e-10	1.1059e-09	1.79277e-09	1	-1	1	-1	1	-1	-1
High	High	High	7.7681e-10	7.3198e-10	1.50879e-09	1	1	1	1	1	1	1
					main effect	5.0257e-10	-7.7135e-11	2.5416e-10	-4.7985e-11	1.98865e-10	-2.08055e-11	3.9355e-12
					sum of squares	1.01031e-18	2.37992e-20	2.58389e-19	9.21024e-21	1.5819e-19	1.73148e-21	6.19526e-23
						sum of squares	degrees of freedom	mean square	F0	p
				T	A	1.01031e-18	1	1.01031e-18	81.4765	1.81358e-05
				Glucose	B	2.37992e-20	1	2.37992e-20	1.9193	0.203334
				Ethanol	C	2.58389e-19	1	2.58389e-19	20.8378	0.00183818
					AB	9.21024e-21	1	9.21024e-21	0.742762	0.413863
					AC	1.5819e-19	1	1.5819e-19	12.7572	0.00727535
					BC	1.73148e-21	1	1.73148e-21	0.139635	0.718352
					ABC	6.19526e-23	1	6.19526e-23	0.00499619	0.945385
					Error	9.91999e-20	8	1.24e-20
					Total	1.56089e-18	15
						n (ie # of replicates)	2
Trial Conditions			Diffusion/Mass transfer property
A	B	C	run 1	run 2	sum
T	Glucose	Ethanol				A	B	C	AB	AC	BC	ABC
Low	Low	Low	0.039231	0.040959	0.08019	-1	-1	-1	1	1	1	-1
Low	High	Low	0.040857	0.039304	0.080161	-1	1	-1	-1	1	-1	1
Low	Low	High	0.098646	0.10046	0.199106	-1	-1	1	1	-1	-1	1
Low	High	High	0.09179	0.091675	0.183465	-1	1	1	-1	-1	1	-1
High	Low	Low	0.073424	0.09257	0.165994	1	-1	-1	-1	-1	1	1
High	High	Low	0.098791	0.086344	0.185135	1	1	-1	1	-1	-1	-1
High	Low	High	0.12641	0.15679	0.2832	1	-1	1	-1	1	-1	-1
High	High	High	0.23677	0.20798	0.44475	1	1	1	1	1	1	1
					main effect	0.0670196	0.0206276	0.0748801	0.0245451	0.0193251	0.0158496	0.0197526
					sum of squares	0.0179665	0.001702	0.0224281	0.00240985	0.00149384	0.00100484	0.00156066
						sum of squares	degrees of freedom	mean square	F0	p
				T	A	0.0179665	1	0.0179665	125.97	3.56316e-06
				Glucose	B	0.001702	1	0.001702	11.9333	0.00863785
				Ethanol	C	0.0224281	1	0.0224281	157.252	1.53186e-06
					AB	0.00240985	1	0.00240985	16.8964	0.0033882
					AC	0.00149384	1	0.00149384	10.4739	0.011943
					BC	0.00100484	1	0.00100484	7.04532	0.0290612
					ABC	0.00156066	1	0.00156066	10.9424	0.0107313
					Error	0.001141	8	0.000142625
					Total	0.0497069	15
